# Supplementary material for: An environmentally responsible synthesis of the antitumor agent lapatinib (Tykerb)
Source: Royal Society of Chemistry journal article supplement (doi:10.1039/d2gc00598k), 2022-01-01
Supplement: d2gc00598k1.pdf [file d2gc00598k1.pdf]

## **Electronic Supplementary Information**

### **An Environmentally Responsible Synthesis of the Antitumor Agent Lapatinib (Tykerb)**

Julie Yu, Karthik S. Iyer, and Bruce H. Lipshutz\*

Department of Chemistry & Biochemistry, University of California,  
Santa Barbara, CA 93106 USA

## Table of Contents

|                                                                |     |
|----------------------------------------------------------------|-----|
| 1. General information .....                                   | S3  |
| 2. Procedures for the synthesis of lapatinib .....             | S4  |
| A. $S_NAr$ reaction.....                                       | S4  |
| • Screening of base.....                                       | S4  |
| B. Nitro reduction .....                                       | S5  |
| C. $S_NAr$ reaction.....                                       | S6  |
| • Screening of base.....                                       | S6  |
| D. Suzuki-Miyaura coupling reaction .....                      | S7  |
| • Screening of palladium catalysts.....                        | S7  |
| • Screening of catalyst loading .....                          | S8  |
| • Reductive amination .....                                    | S9  |
| • Procedures for the 5-step, 3-pot synthesis of lapatinib..... | S9  |
| 3. E Factor calculations .....                                 | S12 |
| 4. Compound characterization data .....                        | S13 |
| 5. NMR spectra .....                                           | S14 |
| 6. HRMS .....                                                  | S16 |
| 7. Purity analysis by HPLC .....                               | S18 |

## 1. General information

Reagents and chemicals were purchased from Sigma-Aldrich, Combi-Blocks, Alfa Aesar, Acros Organics, or TCI Chemicals and used without further purification. Carbonyl iron powder (CIP) used for reductions was 99.9% purity, R10 grade, with average particle size of 2.5-3.5  $\mu\text{m}$ . This material was stored in air with no special precautions. Deuterated solvents were purchased from Cambridge Isotopes Laboratories. TPGS-750-M is either prepared or supplied by PHT International (also available from Sigma-Aldrich catalog #733857). The desired 2 wt % of surfactant solution in HPLC water was prepared by dissolving 2 g of surfactant to 98 g of HPLC water (which was degassed with argon prior to use) and stored under argon. Thin-layer chromatography (TLC) was performed using Silica Gel 60 F254 plates (Merck, 0.25 mm thick). Flash chromatography is performed either manually or in an automated Biotage system using Silica Gel 60 (Silicycle, 40-63 nm). GCMS data were recorded on a 5975C Mass Selective Detector, coupled with a 7890A Gas Chromatograph (Agilent Technologies).  $^1\text{H}$ ,  $^{13}\text{C}$  and  $^{19}\text{F}$  NMR spectra were recorded on either a Bruker Avance III HD 400 MHz (400 MHz for  $^1\text{H}$ , 100 MHz for  $^{13}\text{C}$ ), a Bruker Avance NEO 500 MHz (500 MHz for  $^1\text{H}$ , 125 MHz for  $^{13}\text{C}$ , 470 MHz for  $^{19}\text{F}$ ) or on a Varian Unity Inova 500 MHz (500 MHz for  $^1\text{H}$ , 125 MHz for  $^{13}\text{C}$ ); DMSO- $d_6$ ,  $\text{CDCl}_3$ , or  $\text{CD}_3\text{OD}$  was used as NMR solvent. Residual peaks for DMSO in DMSO- $d_6$  ( $^1\text{H}$  = 2.50 ppm,  $^{13}\text{C}$  = 39.51 ppm),  $\text{CHCl}_3$  in  $\text{CDCl}_3$  ( $^1\text{H}$  = 7.26 ppm,  $^{13}\text{C}$  = 77.00 ppm),  $\text{CH}_3\text{OH}$  in  $\text{CD}_3\text{OD}$  ( $^1\text{H}$  = 3.31 ppm,  $^{13}\text{C}$  = 49.00 ppm) have been assigned. The chemical shifts are reported in parts per million (ppm), the coupling constants  $J$  values are given in Hertz (Hz). The peak patterns are indicated as follows: bs, broad singlet; s, singlet; d, doublet; t, triplet; q, quartet; p, pentet; m, multiplet. HRMS were recorded on a Waters Micromass LCT TOF ES+ Premier mass spectrometer using ESI ionization.

## 2. Procedures for the synthesis of lapatinib

### A. S<sub>N</sub>Ar reaction

- Screening of base

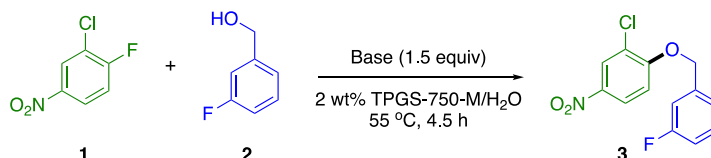

| Entry | Base (1.5 equiv)               | Conversion to <b>3</b> (%) <sup>b</sup> |
|-------|--------------------------------|-----------------------------------------|
| 1     | K <sub>3</sub> PO <sub>4</sub> | 97%                                     |
| 2     | NaO <sup>t</sup> Bu            | 98%                                     |
| 3     | KOH                            | >99%                                    |

<sup>a</sup>Reaction conditions: 0.25 mmol **1**, 0.275 mmol of **2**, 0.375 mmol of base, stirred at 55 °C for 4.5 h; <sup>b</sup> conversion was determined by GC-MS.

In a 1 dram vial equipped with a magnetic stir bar, 2-chloro-1-fluoro-4-nitrobenzene **1** (0.25 mmol), (3-fluorophenyl)methanol **2** (0.275 mmol), and base (0.375 mmol) were added. Aqueous 2 wt % TPGS-750-M solution (0.5 mL) was then added. The resulting mixture was stirred at 55 °C until completion (as monitored by TLC or GC-MS). The desired product was isolated by silica plug filtration and dried under vacuum to give a light-yellow powder in 98% yield.

## B. Nitro reduction

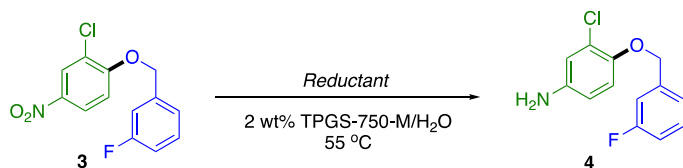

| Entry | Conditions                                               | Conversion to <b>4</b> (%) <sup>c</sup> |
|-------|----------------------------------------------------------|-----------------------------------------|
| 1     | 1% Pd/C (1 mol %), Et <sub>3</sub> SiH (1.5 equiv)       | 0                                       |
| 2     | 1% Pd/C (1 mol %), H <sub>2</sub> balloon                | ~20                                     |
| 3     | 10% Pd/C (1 mol %), H <sub>2</sub> balloon               | ~90                                     |
| 4     | CIP (5 equiv), <sup>d</sup> NH <sub>4</sub> Cl (3 equiv) | 100                                     |

<sup>c</sup>Conversion was determined by NMR; <sup>d</sup>CIP – Carbonyl Iron Powder.

In a 1 dram vial equipped with a magnetic stir bar, 2-chloro-1-((3-fluorobenzyl)oxy)-4-nitrobenzene **3** (0.25 mmol) and the reducing agents were added. Aqueous 2 wt % TPGS-750-M (0.5 mL) solution was added, and the vial was stirred at 55 °C until completion (as monitored by TLC or GC-MS). The reaction mixture was filtered through cotton and then washed with EtOAc or Et<sub>2</sub>O (3 x 1 mL). The combined organic layers were evaporated to give the crude product as a brown colored oil, which was analyzed by GC-MS or crude NMR and used subsequently without further purification.

### C. S<sub>N</sub>Ar reaction

- Screening of base

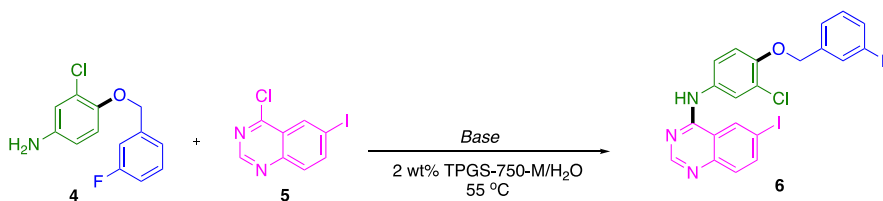

| Entry | Base (1 equiv)                 | Time   | Conversion to <b>6</b> (%) <sup>e</sup> |
|-------|--------------------------------|--------|-----------------------------------------|
| 1     | No base                        | 1.5 h  | 100                                     |
| 2     | K <sub>3</sub> PO <sub>4</sub> | 1.5 h  | ~95                                     |
| 3     | Et <sub>3</sub> N              | 8 h    | ~75                                     |
| 4     | KOH                            | 8 h    | ~85                                     |
| 5     | KO <sup>t</sup> Bu             | 3 days | -                                       |

Reaction conditions: 0.25 mmol **4**, 0.25 mmol **5** and base stirred at 55 °C; <sup>e</sup>conversion was determined by crude NMR.

In a 1 dram vial with a magnetic stir bar, the crude product from the previous step (**4**; 0.25 mmol) was used along with 0.25 mmol **5**. Aqueous 2 wt % TPGS-750-M (0.5 mL) solution was then added, and the reaction was stirred at 55 °C until completion (as monitored by TLC or GC-MS). The product was then separated by vacuum filtration to give a light-yellow powder, **6**.

## D. Suzuki-Miyaura coupling reaction

- Screening of palladium catalysts

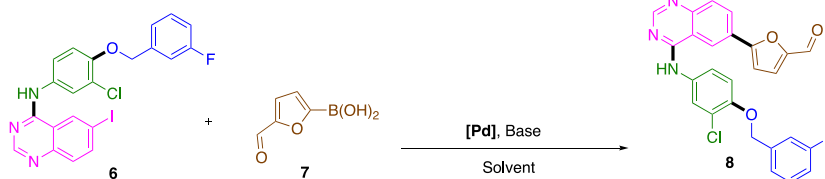

| Entry          | Catalyst                               | Base                        | Solvent                         | Conversion to <b>8</b> (%) <sup>f</sup> |
|----------------|----------------------------------------|-----------------------------|---------------------------------|-----------------------------------------|
| 1              | Pd(dtbpf)Cl <sub>2</sub> (1 mol %)     | Et <sub>3</sub> N (3 equiv) | 2 wt % TPGS-750-M               | <3                                      |
| 2              | Pd(dtbpf)Cl <sub>2</sub> (3 mol %)     | Et <sub>3</sub> N (3 equiv) | 2 wt % TPGS-750-M               | <50                                     |
| 3              | Pd(dppf)Cl <sub>2</sub> ·DCM (4 mol %) | Et <sub>3</sub> N (5 equiv) | 2 wt % TPGS-750-M               | ~50                                     |
| 4 <sup>g</sup> | Pd(dppf)Cl <sub>2</sub> ·DCM (4 mol %) | Et <sub>3</sub> N (5 equiv) | EtOH (reflux)                   | 100                                     |
| 5              | Pd(dppf)Cl <sub>2</sub> ·DCM (4 mol %) | Et <sub>3</sub> N (5 equiv) | 2 wt % TPGS-750-M, 20 v/v% EtOH | <40                                     |
| 6              | Pd(dppf)Cl <sub>2</sub> ·DCM (4 mol %) | Et <sub>3</sub> N (5 equiv) | 50:50 2 wt % TPGS-750-M: EtOH   | <50                                     |
| 7              | 10 wt% Pd/C (3 mol %)                  | Et <sub>3</sub> N (5 equiv) | EtOH (reflux)                   | >90                                     |

Reaction conditions: 0.25 mmol **6**, 0.5 mmol **7** and base, stirred at 55 °C (with TPGS-750-M) or under reflux conditions (with EtOH) overnight. <sup>f</sup>Conversion was determined by crude NMR or GC-MS. <sup>g</sup>Reaction time = 2 h.

In a 2 dram vial with a magnetic stir bar, 0.25 mmol **6**, 0.5 mmol **7**, Pd catalyst and base (1.25 mmol) were added. Aqueous 2 wt % TPGS-750-M solution (0.5 mL) or EtOH (2.5 mL) was subsequently added, and the reaction was allowed to stir at 55 °C (TPGS-750-M) or at 80 °C (EtOH) until completion (as monitored by TLC or GC-MS). The crude product was used for the subsequent reaction without further purification.

- Screening of catalyst loading

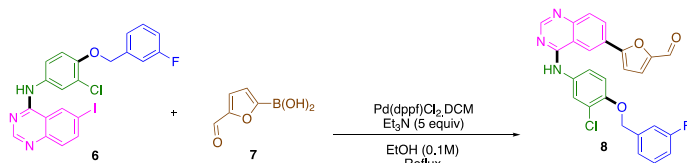

| Entry          | Catalyst loading     | Base                        | Conversion to <b>8</b> (%) <sup>h</sup> |
|----------------|----------------------|-----------------------------|-----------------------------------------|
| 1              | 2 mol % (20,000 ppm) | Et <sub>3</sub> N (3 equiv) | 100                                     |
| 2              | 1 mol % (10,000 ppm) | Et <sub>3</sub> N (3 equiv) | 100                                     |
| 3              | 0.5 mol % (5000 ppm) | Et <sub>3</sub> N (5 equiv) | 100                                     |
| 4 <sup>g</sup> | 0.1 mol % (1000 ppm) | Et <sub>3</sub> N (5 equiv) | 100                                     |
| 5              | 0.05 mol % (500 ppm) | Et <sub>3</sub> N (5 equiv) | 100                                     |

Reaction conditions: 0.25 mmol **6**, 0.5 mmol **7**, 1.25 mmol Et<sub>3</sub>N, stirred at 80 °C for 2 h; <sup>h</sup>Determined by crude NMR or GC-MS.

In a 2 dram vial with a magnetic stir bar, 0.25 mmol **6**, 0.5 mmol **7**, Pd(dppf)Cl<sub>2</sub>.DCM and base (1.25 mmol) were added. Aqueous 2 wt % TPGS-750-M solution (0.5 mL) or EtOH (2.5 mL) was subsequently added, and the reaction was allowed to stir at 55 °C (in aqueous TPGS-750-M) or at 80 °C (EtOH) until completion (as monitored by TLC or GC-MS).



- **Reductive amination**

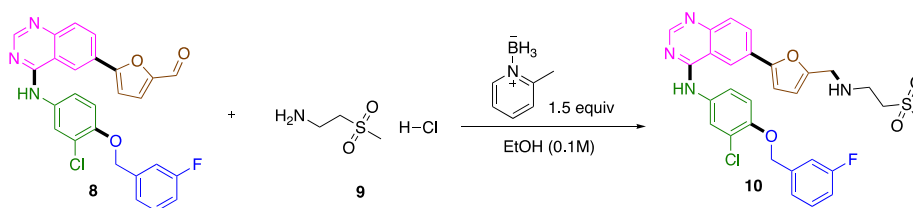

In the same 2 dram vial from the previous reaction was added 2-(methylsulfonyl)ethan-1-amine hydrochloride **9** (1.2 equiv) and 2-picolineborane (1.5 equiv) and the reaction mixture was allowed to stir at 55 °C until completion (as monitored by crude NMR or GC-MS). The resulting product was purified by column chromatography using DCM : EtOAc (3:1) + 2% MeOH + 1% Et<sub>3</sub>N as the mobile phase to yield lapatinib free base **10** as a light brown oil.

- **Procedures for the 5-step, 3-pot synthesis of lapatinib**

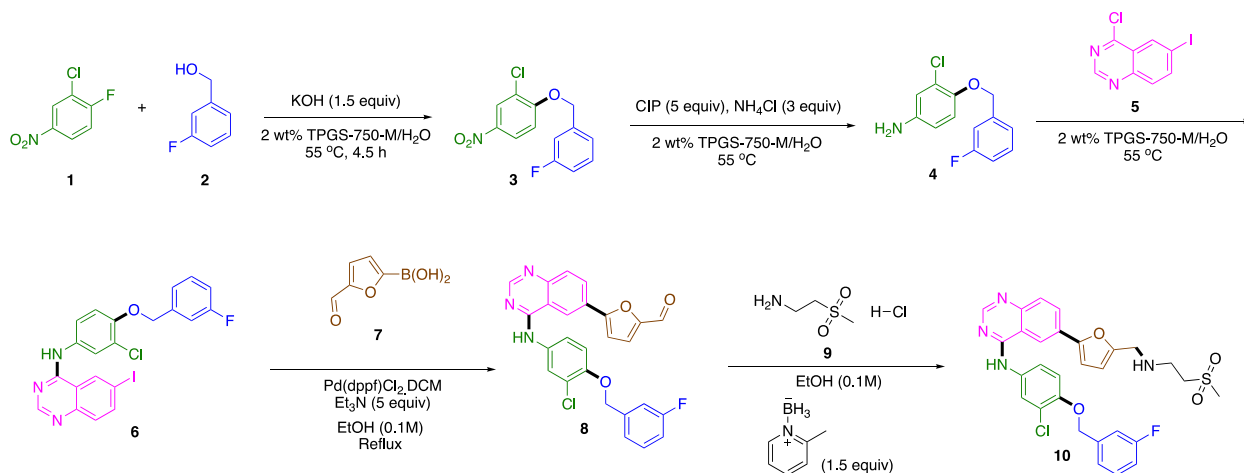

**Step 1: S<sub>N</sub>Ar reaction**

In a 1 dram vial with a magnetic stir bar, 2-chloro-1-fluoro-4-nitrobenzene **1** (0.15 mmol, 1 equiv), (3-fluorophenyl)methanol **2** (1.1 equiv) and KOH (1.5 equiv) were added. Aqueous 2 wt % TPGS-750-M solution (0.5 M global concentration) was then added. The reaction was stirred at 55 °C until completion (as monitored by TLC or GC-MS).

**Step 2: Reduction of nitro group**

Once step 1 (S<sub>N</sub>Ar) was completed, CIP (carbonyl iron powder; 5 equiv) and NH<sub>4</sub>Cl (3 equiv) were added. 20 v/v% EtOAc (0.1 mL) was added to enhance solubility and stirring. The pH of the system

was adjusted to neutral or slightly acidic (pH 6 – 7) by adding a few drops of concentrated HCl if needed. Subsequently, the resulting mixture was allowed to stir at 55 °C until completion (as monitored by TLC or GC-MS). The reaction mixture was filtered through a silica plug and washed with EtOAc (~3 mL). The solvents were evaporated to give the crude product as a brown colored oil, which was analyzed by GC-MS or crude NMR and used subsequently without further purification.

#### Step 3: S<sub>N</sub>Ar reaction

In a 1 dram vial with a magnetic stir bar, the crude product from step 2 was used along with 4-chloro-6-iodoquinazoline **5** (1 equiv). Aqueous 2 wt % TPGS-750-M (0.5 M global concentration) solution was then added, and the reaction was stirred at 55 °C until completion (as monitored by TLC or GC-MS). The product was then separated by vacuum filtration to give a light-yellow powder **6**.

Note: The presence of water is detrimental for the subsequent Suzuki-Miyaura coupling. Water can be removed by vacuum filtration. Alternatively, the Suzuki-Miyaura coupling can also be carried out in the same pot if the water is dried by placing the resulting reaction vial from step 3 in an oven at 120 °C for 2 h, or by placing it in a hot plate at 60 °C and attaching a high vacuum line overnight.

#### Step 4: Suzuki-Miyaura reaction

The product from step 3, **6** (1 equiv), was transferred to a 2 dram vial equipped with a magnetic stir bar. To the vial, 5-formyl furan-2-boronic acid **7** (2 equiv), Pd(dppf)Cl<sub>2</sub>•DCM (500 ppm) and Et<sub>3</sub>N (5 equiv) were added, followed by 95% ethanol (1.5 mL or 0.1 M global concentration). The reaction was allowed to stir at 80 °C until completion (as monitored by taking a crude NMR, TLC, or GC-MS). The crude product was analyzed by NMR (in DMSO-d<sub>6</sub>) and was used in the subsequent step without further purification.

\*Note: Pd(dppf)Cl<sub>2</sub>•DCM (500 ppm) was added by preparing a stock solution of Pd(dppf)Cl<sub>2</sub>•DCM in ethanol.

\*Pd(dppf)Cl<sub>2</sub> (with no DCM complex) failed to give the product under the same reaction conditions.

#### Step 5: Reductive amination

To the same 2 dram vial from the previous step was added 2-(methylsulfonyl)ethan-1-amine hydrochloride **9** (1.2 equiv) and 2-picolineborane (1.5 equiv). The reaction mixture was allowed to stir until completion (as monitored by NMR, TLC, or GC-MS). The resulting mixture was purified by recrystallization in EtOAc to yield lapatinib free base **10** as light-yellow solid, (49.7 mg, 0.086 mmol, 57% yield).

Alternatively, the resulting product was purified by column chromatography using DCM : EtOAc (3:1) + 2% MeOH + 1% Et<sub>3</sub>N as the mobile phase to yield lapatinib free base **10** as a light brown oil (48.8 mg, 0.084 mmol, 56% yield).

### 3. E Factor calculations

$$E \text{ Factor} = \frac{\text{grams of wastes}}{\text{grams of product}}$$

- **This work:**

waste:

$$\begin{aligned} &0.5 \text{ ml TPGS-750-M (aq)} + 0.1 \text{ ml EtOAc} + 3.0 \text{ ml EtOAc} + 0.5 \text{ ml TPGS-750-M (aq)} + 2.5 \text{ ml EtOH} \\ &= 0.5 \text{ g TPGS-750-M (aq)} + 0.1 \text{ g EtOAc} + 3.3 \text{ ml EtOAc} + 0.5 \text{ ml TPGS-750-M (aq)} + 2.8 \text{ ml EtOH} \\ &= 7.2 \text{ g wastes} \end{aligned}$$

(density of EtOAc = 0.902 kg/m<sup>3</sup>; density of EtOH = 0.789 kg/m<sup>3</sup>)

$$E \text{ Factor} = \frac{7.2 \text{ grams of wastes}}{0.808 \text{ grams of product}} = \underline{\underline{8.9}}$$

- **Literature:** (US 8444988 B2) GSK, 2013

waste:

$$\begin{aligned} &90.0 \text{ mL CH}_3\text{CN (aq)} + 180.0 \text{ mL EtOH} + 250.0 \text{ mL } i\text{-PrOH} + 740.5 \text{ mL THF} + x \text{ mL (unstated volume)} \\ &\text{dioxane and THF} \\ &= 114.5 \text{ g CH}_3\text{CN (aq)} + 228.1 \text{ g EtOH} + 318.1 \text{ g } i\text{-PrOH} + 833.9 \text{ ml THF} + x \text{ g dioxane and THF} \\ &= 1494.6 \text{ g} + x \text{ waste} \end{aligned}$$

(density of CH<sub>3</sub>CN = 0.786 kg/m<sup>3</sup>; density of EtOH = 0.789 kg/m<sup>3</sup>; density of *i*-PrOH = 0.786 kg/m<sup>3</sup>; density of THF = 0.888 kg/m<sup>3</sup>)

$$E \text{ Factor} = \frac{1494.6 \text{ grams of wastes}}{10.0 \text{ grams of product}} > \underline{\underline{149.5}}$$

## 4. Compound characterization data

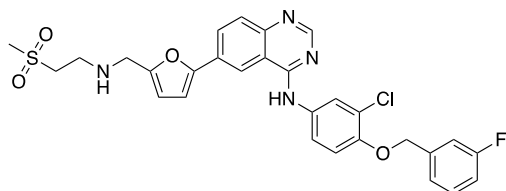

lapatinib

**<sup>1</sup>H NMR** (600 MHz, CD<sub>3</sub>OD) δ 8.75 (s, 1H), 8.51 (s, 1H), 8.23 (d, *J* = 8.5 Hz, 1H), 7.91 (dd, *J* = 2.7, 1.2 Hz, 1H), 7.80 (d, *J* = 8.6 Hz, 1H), 7.66 – 7.61 (m, 1H), 7.42 – 7.36 (m, 1H), 7.30 (d, *J* = 7.7 Hz, 1H), 7.24 (dd, *J* = 9.9, 2.4 Hz, 1H), 7.17 (dd, *J* = 8.9, 1.1 Hz, 1H), 7.07 – 7.00 (m, 2H), 6.68 (s, 1H), 5.22 (s, 2H), 4.23 (s, 2H), 3.49 (d, *J* = 7.0 Hz, 2H), 3.43 (d, *J* = 8.2 Hz, 2H), 3.06 (s, 3H).

**<sup>13</sup>C NMR** (101 MHz, CDCl<sub>3</sub>) δ 162.95 (d, *J*<sub>C-F</sub> = 246.4), 157.82, 154.69, 153.26, 152.41, 150.75, 149.21, 139.14 (d, *J*<sub>C-F</sub> = 7.1) 132.71, 130.1 (d, *J*<sub>C-F</sub> = 8.1) 128.87, 128.69, 128.64, 124.85, 123.14, 122.44 (d, *J*<sub>C-F</sub> = 3.0), 122.13, 115.59, 114.83 (d, *J*<sub>C-F</sub> = 21.2), 114.26, 113.94 (d, *J*<sub>C-F</sub> = 22.2), 109.63, 107.10, 70.36, 54.45, 45.40, 42.00, 41.83.

**<sup>19</sup>F NMR** (376 MHz, CDCl<sub>3</sub>) δ -112.66 (td, *J*<sub>F-H</sub> = 9.1, 5.6 Hz).

**HRMS TOF MS EI+** *m/z* calcd C<sub>29</sub>H<sub>26</sub>ClFN<sub>4</sub>O<sub>4</sub>SH [M+H]<sup>+</sup>: 581.1426; found 581.1405.

## 5. NMR spectra

### $^1\text{H}$ , $^{13}\text{C}$ , and $^{19}\text{F}$ NMR of lapatinib

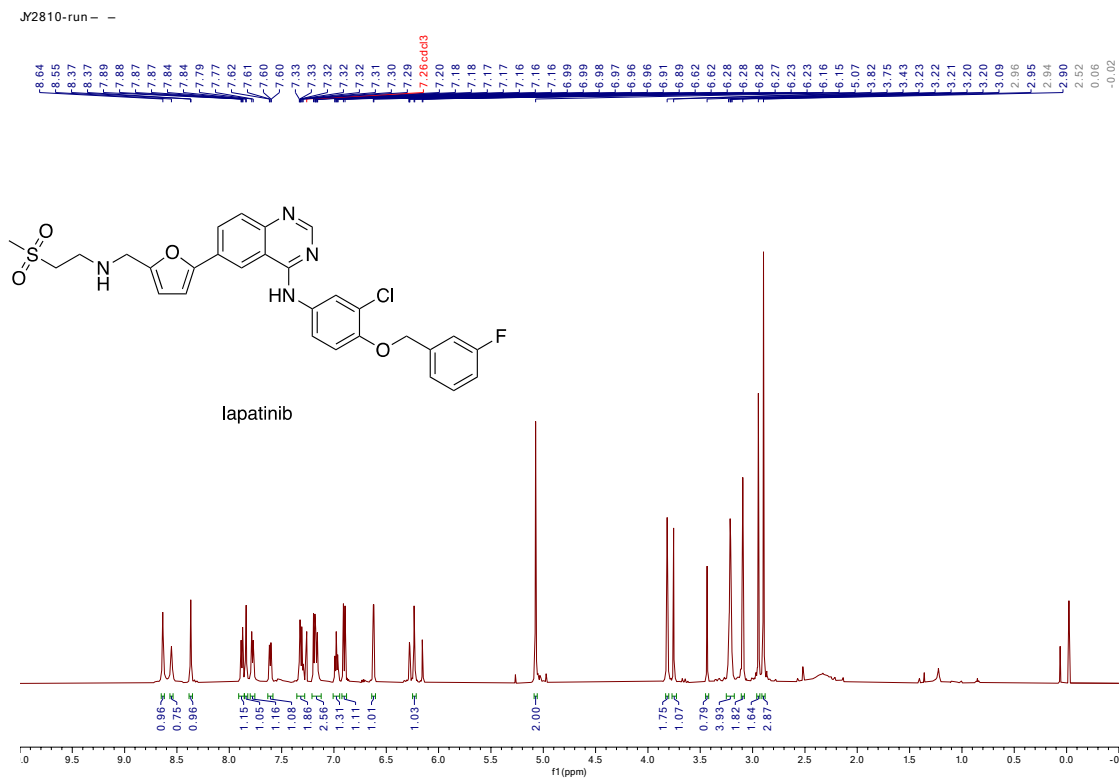

JY2810\_rerun\_C13.1.fid

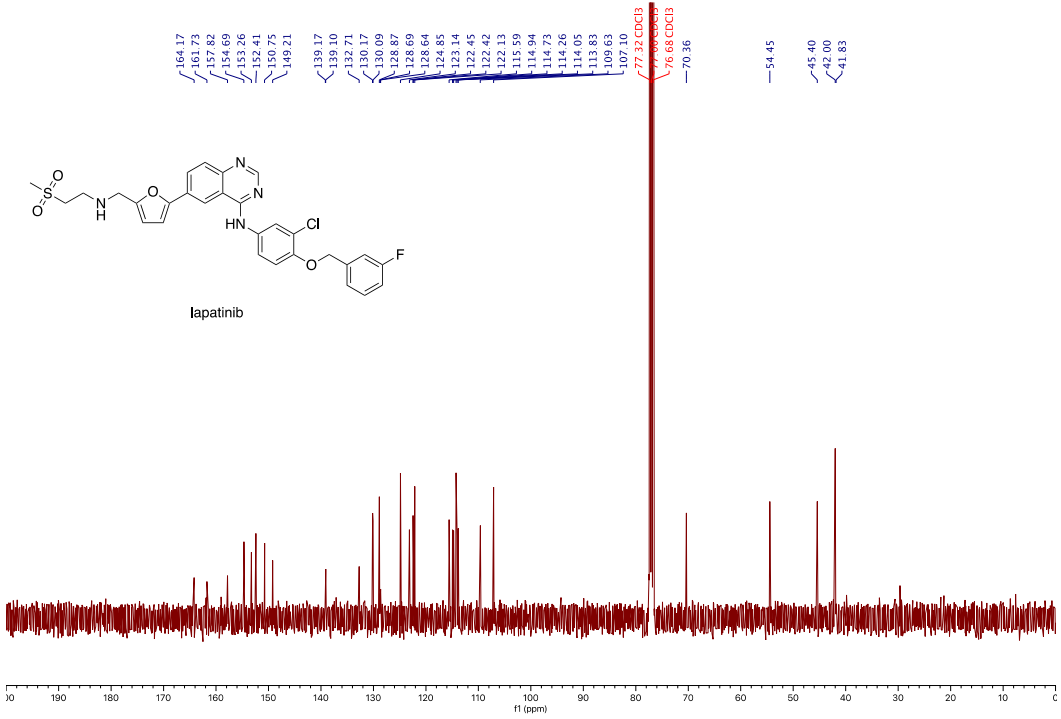

JY2810\_F19.1.fid

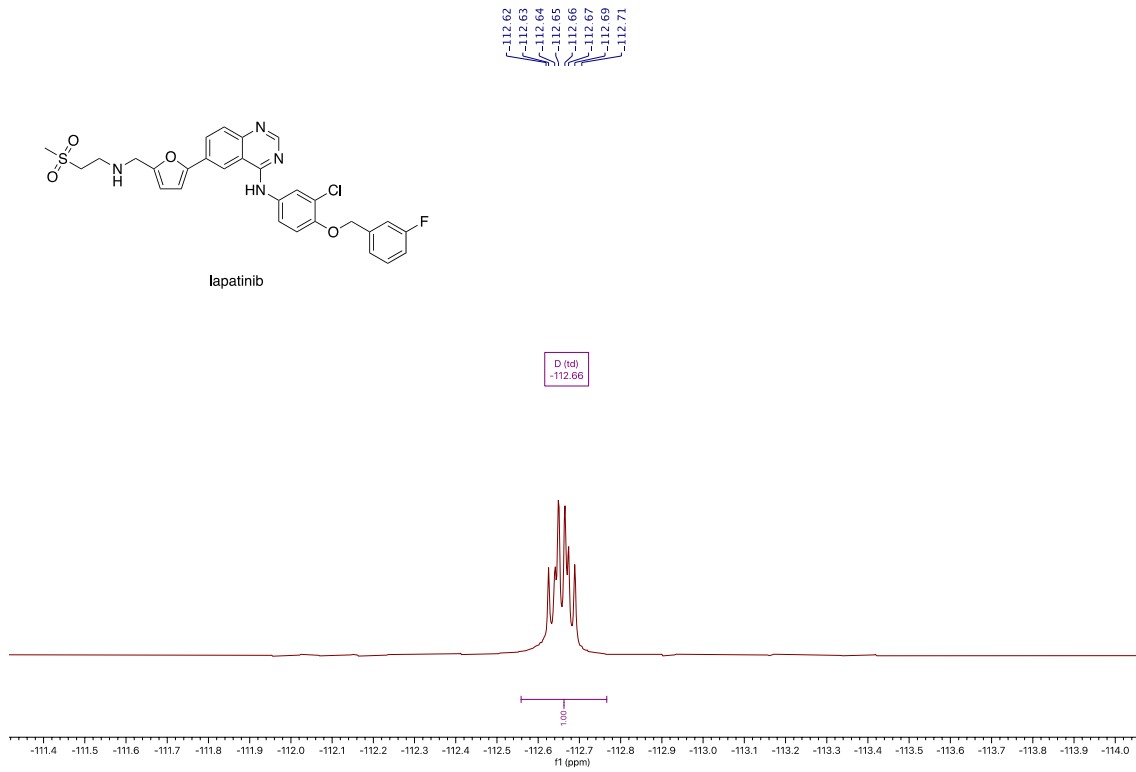

## 6. HRMS

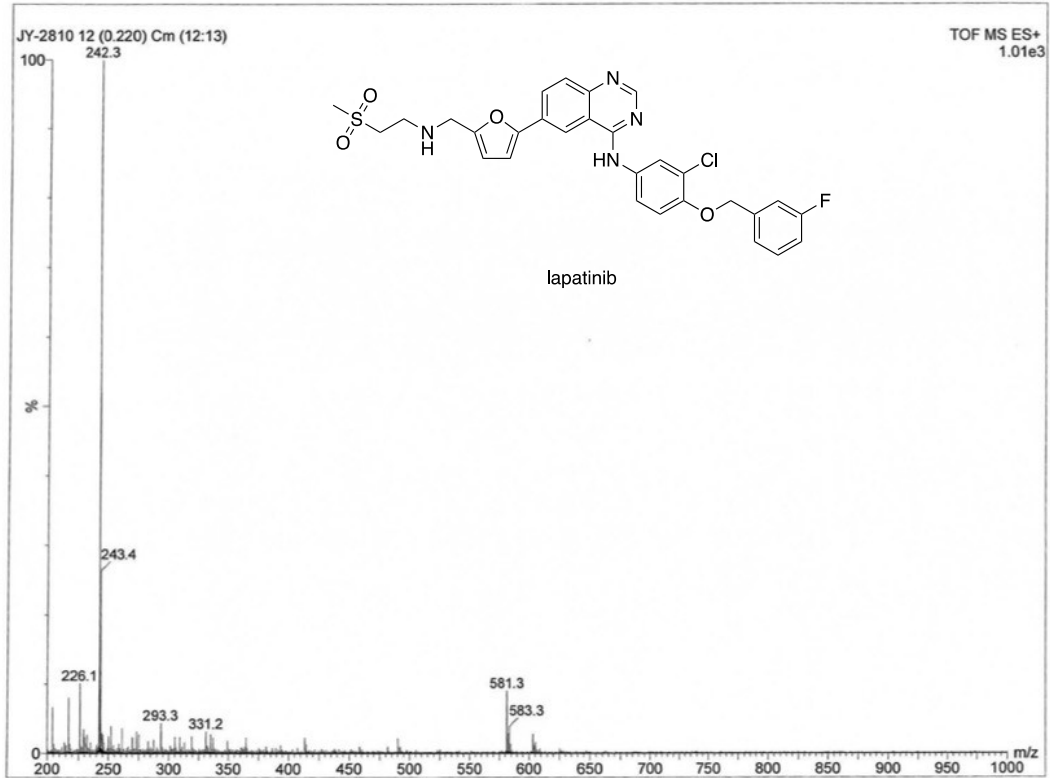



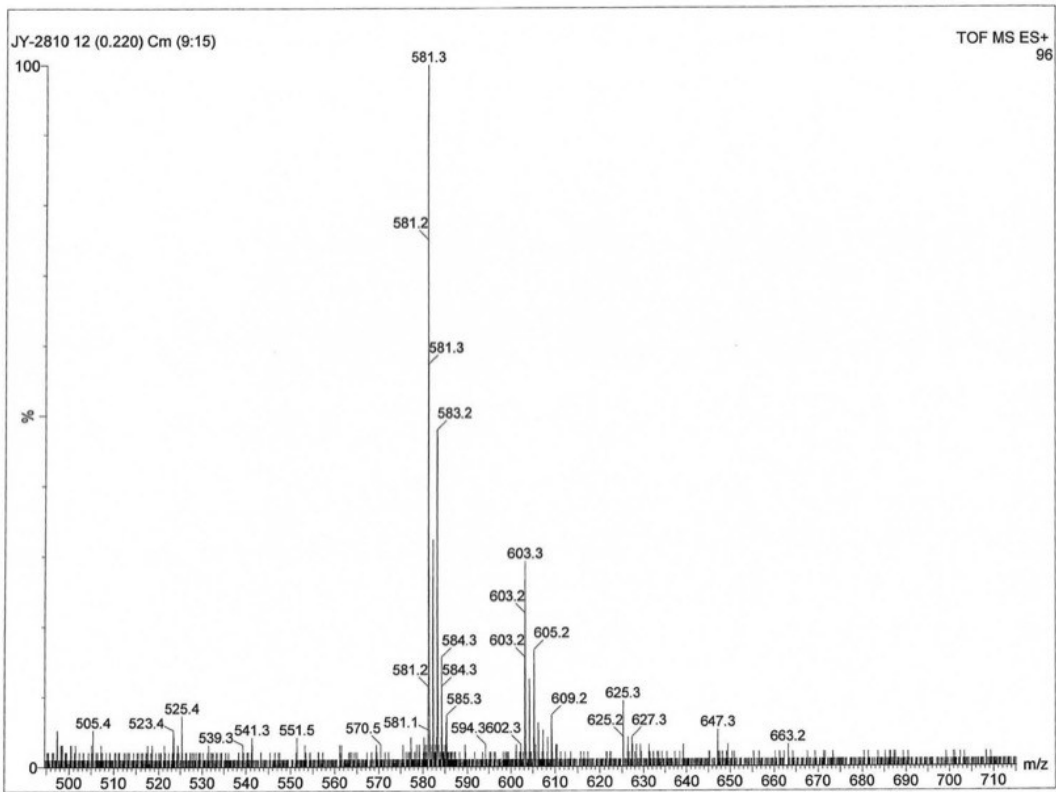

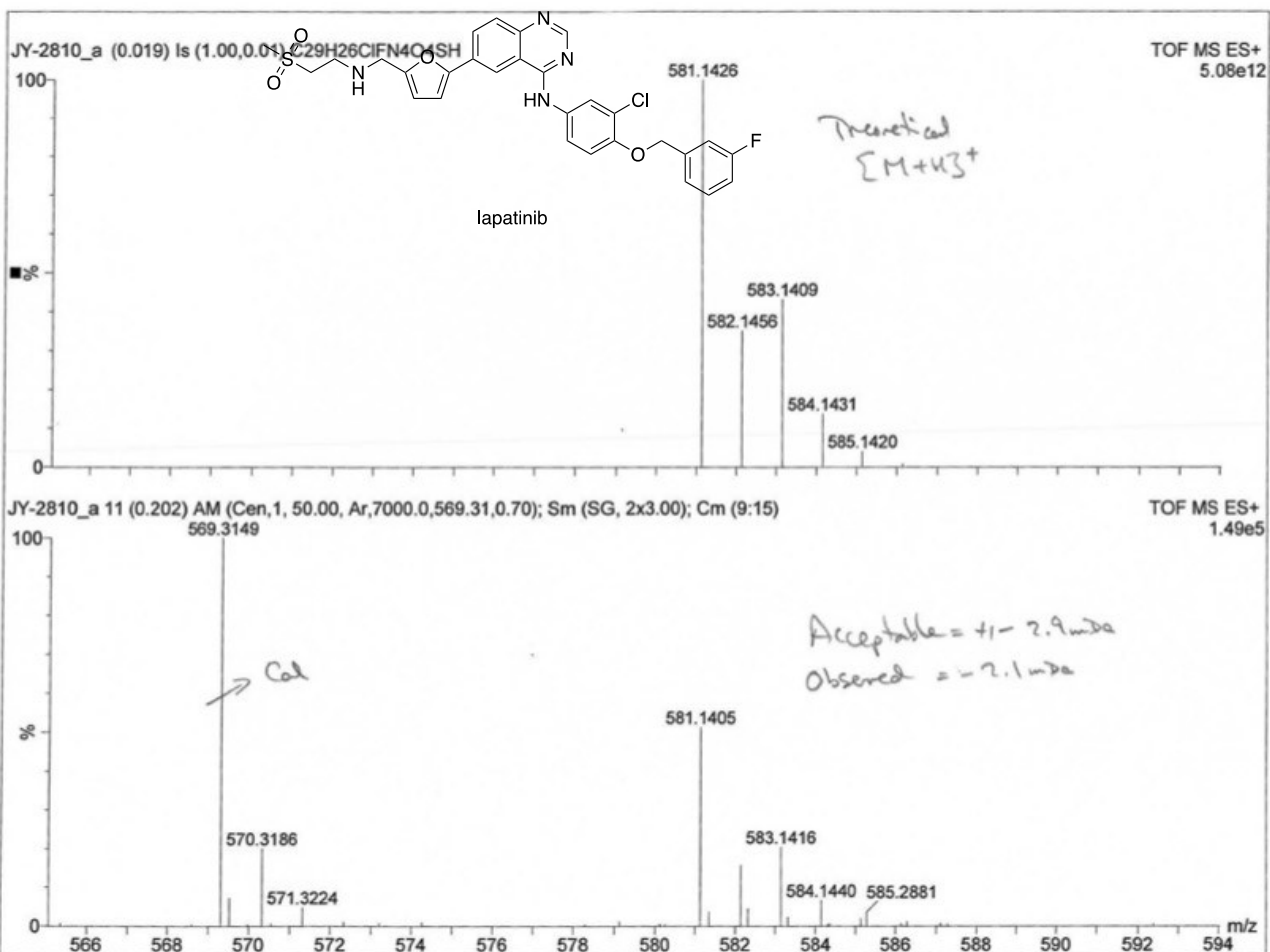

## 7. Purity analysis by HPLC

Column: InfinityLab Poroshell HPH-C18, 2.7 micron, 4.6 x 50 mm

Eluent: hexane/ *i*-PrOH = 90/10

Flow rate: 1 mL/min

Column temperature: 20 °C

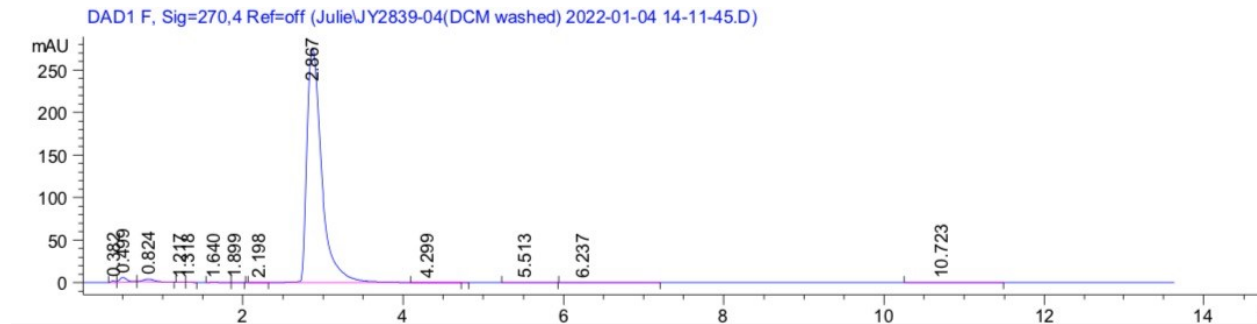

Signal 6: DAD1 F, Sig=270,4 Ref=off

| Peak # | Ret Time [min] | Type | Width [min] | Area [mAU*s] | Height [mAU] | Area %   |
|--------|----------------|------|-------------|--------------|--------------|----------|
| 1      | 0.382          | BV   | 0.0545      | 5.91052      | 1.70355      | 0.1655   |
| 2      | 0.499          | W R  | 0.0932      | 34.15775     | 5.44683      | 0.9564   |
| 3      | 0.824          | BB   | 0.1479      | 30.27498     | 3.15671      | 0.8477   |
| 4      | 1.217          | BV   | 0.0648      | 3.24298e-1   | 8.08731e-2   | 9.080e-3 |
| 5      | 1.318          | VB   | 0.0856      | 2.81078e-1   | 5.32584e-2   | 7.870e-3 |
| 6      | 1.640          | BV   | 0.1532      | 1.94257      | 1.83929e-1   | 0.0544   |
| 7      | 1.899          | VB   | 0.0874      | 3.13159e-1   | 5.58503e-2   | 8.769e-3 |
| 8      | 2.198          | BV E | 0.1127      | 7.74780e-1   | 1.09258e-1   | 0.0217   |
| 9      | 2.867          | W R  | 0.1953      | 3483.06519   | 275.81552    | 97.5268  |
| 10     | 4.299          | VB E | 0.2295      | 2.02840      | 1.18630e-1   | 0.0568   |
| 11     | 5.513          | BB   | 0.2504      | 4.36215      | 2.61799e-1   | 0.1221   |
| 12     | 6.237          | BB   | 0.3664      | 4.30216      | 1.47452e-1   | 0.1205   |
| 13     | 10.723         | BB   | 0.3784      | 3.65734      | 1.16457e-1   | 0.1024   |

Total s : 3571.39438 287.25012
